# Supplementary material for: Safety Assessment of 3S, 3’S Astaxanthin Derived from Metabolically Engineered K. marxianus
Source: MDPI journal article supplement (doi:10.3390/antiox11112288), 2022-11-18
Supplement: s1 [file s1]

## Supplementary Table

**Table S1.**

Basic design for animal study

| Group No.                | Dose<br>(mg/kg/day) | Dose Conc.<br>(mg/mL) | Dose Volume<br>(mL/kg) | No. of Animals |
|--------------------------|---------------------|-----------------------|------------------------|----------------|
| 1<br>( Vehicle control ) | 0                   | 0                     | 3                      | 10M, 10F       |
| 2<br>( Low-dose )        | 6                   | 2                     | 3                      | 10M, 10F       |
| 3<br>( Mid-dose )        | 12                  | 4                     | 3                      | 10M, 10F       |
| 4<br>( High-dose )       | 24                  | 8                     | 3                      | 10M, 10F       |

**Table S2.**

Items analyzed for Toxicity Study

|             |                                                  |
|-------------|--------------------------------------------------|
| Hematology  | Red blood cell counts (RBC)                      |
|             | White blood cell counts (WBC)                    |
|             | Platelet counts (PLT)                            |
|             | Hemoglobin (HGB)                                 |
|             | Hematocrit (HCT)                                 |
|             | Mean Corpuscular Volume (MCV)                    |
|             | Mean Corpuscular Hemoglobin (MCH)                |
|             | Mean Corpuscular Hemoglobin Concentration (MCHC) |
|             | Reticulocyte (RET)                               |
|             | WBC differential                                 |
|             | neutrophils (NEUT)                               |
|             | eosinophils (EOSIN)                              |
|             | basophils (BASO)                                 |
|             | monocytes (MONO)                                 |
|             | lymphocytes (LYMPH)                              |
| Coagulation | Activated partial thromboplastin time (APTT)     |
|             | Prothrombin time (PT)                            |
|             | Fibrinogen (FIB)                                 |
|             | Amylase (AMY)                                    |
|             | Albumin (ALB)                                    |
|             | Alkaline phosphatase (ALP)                       |
|             | Total bilirubin (T-BIL)                          |

|                               |                                  |
|-------------------------------|----------------------------------|
| Serum Chemistry               | Alanine aminotransferase (ALT)   |
|                               | Aspartate aminotransferase (AST) |
|                               | Gamma-glutamyl transferase (GGT) |
|                               | Total bile acids (TBA)           |
|                               | Total protein (TP)               |
|                               | Creatinine (CRE)                 |
|                               | Blood Urea nitrogen (BUN)        |
|                               | Total Cholesterol (CHO)          |
|                               | Triglycerides (TG)               |
|                               | Creatine kinase (CK)             |
|                               | Lactate dehydrogenase (LDH)      |
|                               | Chloride (Cl)                    |
|                               | Sodium (Na)                      |
|                               | Potassium (K)                    |
|                               | Glucose (GLU)                    |
|                               | Calcium (Ca)                     |
|                               | Phosphorus (P)                   |
|                               | pH                               |
|                               | Specific gravity                 |
| Urinalysis                    | Protein                          |
|                               | Glucose                          |
|                               | Ketone                           |
|                               | Bilirubin                        |
|                               | Urobilinogen                     |
|                               | Occulted blood                   |
|                               | Leukocytes                       |
|                               | Nitrite                          |
|                               | Red blood cell                   |
|                               | White blood cell                 |
| Urinary Sediments Examination | Cells                            |
|                               | Casts                            |
|                               | Crystals                         |
|                               | Microbes                         |

**Table S3.**

A. Mean body weight of rats receiving astaxanthin over 13-week period

| Mean Body Weights (g, Mean $\pm$ SD) |        |
|--------------------------------------|--------|
| Male                                 | Female |

| Study                   | Vehicle<br>Control | Low-dose<br>6     | Mid-dose<br>12    | High-dose<br>24   | Vehicle<br>Control | Low-dose<br>6     | Mid-dose<br>12    | High-dose<br>24   |
|-------------------------|--------------------|-------------------|-------------------|-------------------|--------------------|-------------------|-------------------|-------------------|
| Day                     | 0 mg/kg/day        | mg/kg/day         | mg/kg/day         | mg/kg/day         | 0<br>mg/kg/day     | mg/kg/day         | mg/kg/day         | mg/kg/day         |
| Number<br>of<br>animals | 10                 | 10                | 10                | 10                | 10                 | 10                | 10                | 10                |
| Day 1                   | 182.25 ±<br>7.90   | 183.03 ±<br>9.41  | 181.76 ±<br>8.31  | 182.49 ±<br>9.05  | 156.73 ±<br>7.46   | 153.36 ±<br>5.70  | 156.79 ±<br>6.96  | 154.93 ±<br>7.47  |
| Day 8                   | 241.90 ±<br>10.10  | 242.92 ±<br>15.85 | 238.14 ±<br>8.88  | 236.88 ±<br>8.53  | 178.69 ±<br>8.24   | 175.25 ±<br>9.96  | 173.92 ±<br>11.31 | 176.21 ±<br>7.00  |
| Day 15                  | 299.41 ±<br>13.36  | 298.53 ±<br>23.42 | 291.20 ±<br>16.54 | 289.90 ±<br>14.95 | 192.81 ±<br>7.63   | 190.58 ±<br>12.85 | 187.03 ±<br>15.17 | 193.74 ±<br>5.35  |
| Day 22                  | 351.21 ±<br>18.00  | 347.76 ±<br>33.52 | 340.45 ±<br>25.02 | 337.03 ±<br>22.26 | 206.16 ±<br>11.32  | 204.25 ±<br>11.23 | 202.71 ±<br>16.74 | 205.51 ±<br>4.91  |
| Day 29                  | 392.90 ±<br>22.96  | 390.61 ±<br>43.53 | 381.23 ±<br>32.01 | 376.63 ±<br>27.66 | 215.43 ±<br>13.07  | 215.26 ±<br>11.86 | 215.51 ±<br>17.32 | 219.18 ±<br>7.41  |
| Day 36                  | 429.75 ±<br>27.87  | 422.16 ±<br>49.88 | 411.88 ±<br>36.96 | 406.39 ±<br>32.03 | 230.87 ±<br>14.37  | 227.68 ±<br>11.89 | 226.26 ±<br>19.57 | 228.64 ±<br>7.44  |
| Day 43                  | 458.07 ±<br>32.25  | 450.94 ±<br>52.13 | 437.34 ±<br>42.09 | 431.71 ±<br>33.91 | 237.20 ±<br>16.45  | 237.29 ±<br>12.44 | 233.95 ±<br>18.43 | 241.09 ±<br>6.78  |
| Day 50                  | 485.62 ±<br>33.43  | 474.10 ±<br>58.69 | 457.29 ±<br>46.49 | 453.31 ±<br>39.23 | 243.31 ±<br>18.40  | 241.73 ±<br>12.90 | 240.75 ±<br>19.40 | 243.02 ±<br>6.38  |
| Day 57                  | 508.60 ±<br>35.79  | 501.29 ±<br>64.23 | 477.82 ±<br>48.82 | 474.56 ±<br>41.96 | 248.55 ±<br>18.13  | 246.12 ±<br>13.47 | 245.19 ±<br>19.19 | 246.87 ±<br>8.65  |
| Day 64                  | 526.29 ±<br>37.66  | 515.44 ±<br>68.02 | 492.98 ±<br>52.61 | 491.19 ±<br>44.31 | 257.46 ±<br>18.14  | 252.23 ±<br>14.43 | 250.16 ±<br>20.11 | 254.14 ±<br>8.54  |
| Day 71                  | 544.66 ±<br>41.26  | 532.41 ±<br>69.48 | 507.16 ±<br>57.15 | 505.40 ±<br>42.48 | 258.77 ±<br>19.63  | 256.98 ±<br>13.08 | 253.92 ±<br>17.91 | 257.81 ±<br>8.87  |
| Day 78                  | 558.39 ±<br>40.71  | 546.69 ±<br>70.60 | 519.89 ±<br>60.31 | 520.76 ±<br>47.54 | 261.86 ±<br>20.38  | 258.85 ±<br>15.95 | 258.05 ±<br>19.73 | 259.67 ±<br>8.99  |
| Day 85                  | 573.36 ±<br>44.74  | 559.04 ±<br>74.11 | 531.01 ±<br>61.23 | 534.14 ±<br>48.61 | 266.93 ±<br>20.97  | 263.25 ±<br>16.15 | 262.08 ±<br>20.86 | 262.35 ±<br>10.30 |
| Day 91                  | 583.10 ±<br>45.14  | 596.31 ±<br>78.13 | 540.59 ±<br>60.80 | 543.34 ±<br>51.12 | 267.03 ±<br>21.13  | 265.87 ±<br>14.67 | 261.79 ±<br>19.43 | 264.88 ±<br>8.43  |

B. Mean body weight gain of rats receiving astaxanthin over 13-week period

| Mean Body Weights (g, Mean $\pm$ SD) |                                      |                            |                             |                              |                                   |                            |                             |                              |
|--------------------------------------|--------------------------------------|----------------------------|-----------------------------|------------------------------|-----------------------------------|----------------------------|-----------------------------|------------------------------|
| Study Day                            | Male                                 |                            |                             |                              | Female                            |                            |                             |                              |
|                                      | Vehicle<br>Control<br>0<br>mg/kg/day | Low-dose<br>6<br>mg/kg/day | Mid-dose<br>12<br>mg/kg/day | High-dose<br>24<br>mg/kg/day | Vehicle<br>Control<br>0 mg/kg/day | Low-dose<br>6<br>mg/kg/day | Mid-dose<br>12<br>mg/kg/day | High-dose<br>24<br>mg/kg/day |
| Number of<br>animals                 | 10                                   | 10                         | 10                          | 10                           | 10                                | 10                         | 10                          | 10                           |
| Day 1-8                              | 59.65 $\pm$ 6.48                     | 59.89 $\pm$ 11.98          | 56.38 $\pm$ 7.43            | 54.39 $\pm$ 6.30             | 21.96 $\pm$ 5.25                  | 21.89 $\pm$ 6.89           | 17.13 $\pm$ 7.36            | 21.28 $\pm$ 3.99             |
| Day 8-15                             | 57.51 $\pm$ 8.02                     | 55.61 $\pm$ 10.33          | 53.06 $\pm$ 8.60            | 53.02 $\pm$ 7.90             | 14.12 $\pm$ 5.14                  | 15.33 $\pm$ 5.38           | 13.11 $\pm$ 6.73            | 17.53 $\pm$ 3.74             |
| Day 15-22                            | 51.80 $\pm$ 6.23                     | 49.23 $\pm$ 11.53          | 49.25 $\pm$ 10.25           | 47.13 $\pm$ 8.68             | 13.35 $\pm$ 5.66                  | 13.67 $\pm$ 4.35           | 15.68 $\pm$ 4.08            | 11.77 $\pm$ 5.55             |
| Day 22-29                            | 41.69 $\pm$ 5.98                     | 42.85 $\pm$ 12.21          | 40.78 $\pm$ 10.84           | 39.60 $\pm$ 7.37             | 9.27 $\pm$ 4.54                   | 11.01 $\pm$ 4.81           | 12.80 $\pm$ 3.24            | 13.67 $\pm$ 6.55             |
| Day 29-36                            | 36.85 $\pm$ 6.76                     | 31.55 $\pm$ 7.05           | 30.65 $\pm$ 6.43            | 29.76 $\pm$ 6.76             | 15.44 $\pm$ 4.80                  | 12.42 $\pm$ 5.40           | 10.75 $\pm$ 3.99            | 9.46 $\pm$ 7.04              |
| Day 36-43                            | 28.32 $\pm$ 5.00                     | 28.78 $\pm$ 3.93           | 25.46 $\pm$ 6.23            | 25.32 $\pm$ 4.35             | 6.33 $\pm$ 3.02                   | 9.61 $\pm$ 3.23            | 7.69 $\pm$ 4.25             | 12.45 $\pm$ 4.63*            |
| Day 43-50                            | 27.55 $\pm$ 4.25                     | 23.16 $\pm$ 7.20           | 19.95 $\pm$ 6.02            | 21.60 $\pm$ 6.78             | 6.11 $\pm$ 5.67                   | 4.44 $\pm$ 4.78            | 6.80 $\pm$ 5.19             | 1.93 $\pm$ 4.53              |
| Day 50-57                            | 22.98 $\pm$ 5.41                     | 27.19 $\pm$ 6.13           | 20.53 $\pm$ 3.70            | 21.25 $\pm$ 4.22             | 5.24 $\pm$ 5.64                   | 4.39 $\pm$ 5.77            | 4.44 $\pm$ 2.76             | 3.85 $\pm$ 4.47              |
| Day 57-64                            | 17.69 $\pm$ 7.01                     | 14.15 $\pm$ 6.46           | 15.16 $\pm$ 5.05            | 16.63 $\pm$ 5.52             | 8.91 $\pm$ 4.27                   | 6.11 $\pm$ 5.55            | 4.97 $\pm$ 4.02             | 7.27 $\pm$ 5.53              |
| Day 64-71                            | 18.37 $\pm$ 5.62                     | 16.97 $\pm$ 4.82           | 14.18 $\pm$ 5.77            | 14.21 $\pm$ 4.55             | 1.31 $\pm$ 4.97                   | 4.75 $\pm$ 2.68            | 3.76 $\pm$ 5.62             | 3.67 $\pm$ 4.57              |
| Day 71-78                            | 13.73 $\pm$ 3.26                     | 14.28 $\pm$ 4.67           | 12.73 $\pm$ 5.88            | 15.36 $\pm$ 6.87             | 3.09 $\pm$ 5.56                   | 1.87 $\pm$ 6.71            | 4.13 $\pm$ 4.61             | 1.86 $\pm$ 2.55              |
| Day 78-85                            | 14.97 $\pm$ 5.47                     | 12.35 $\pm$ 6.13           | 11.12 $\pm$ 4.42            | 13.38 $\pm$ 4.03             | 5.07 $\pm$ 5.35                   | 4.40 $\pm$ 4.93            | 4.03 $\pm$ 4.48             | 2.68 $\pm$ 3.73              |
| Day 85-91                            | 9.74 $\pm$ 3.74                      | 10.27 $\pm$ 6.94           | 9.58 $\pm$ 3.06             | 9.20 $\pm$ 5.64              | 0.10 $\pm$ 4.65                   | 2.62 $\pm$ 6.67            | -0.29 $\pm$ 4.49            | 2.53 $\pm$ 3.73              |
| Day 1-91                             | 400.85 $\pm$ 44.38                   | 386.28 $\pm$ 77.95         | 358.63 $\pm$ 61.13          | 360.85 $\pm$ 53.01           | 110.30 $\pm$ 19.14                | 112.51 $\pm$ 15.20         | 105.00 $\pm$ 17.95          | 109.95 $\pm$ 9.17            |

\*:  $p \leq 0.05$  (compared to vehicle control group)

Table S4.

Mean food consumption of rats receiving astaxanthin over 13-week period

| Mean Food Consumption (g/day, Mean $\pm$ SD) |                                   |                            |                             |                              |                                      |                            |                             |                              |
|----------------------------------------------|-----------------------------------|----------------------------|-----------------------------|------------------------------|--------------------------------------|----------------------------|-----------------------------|------------------------------|
| Study Day                                    | Male                              |                            |                             |                              | Female                               |                            |                             |                              |
|                                              | Vehicle<br>Control<br>0 mg/kg/day | Low-dose<br>6<br>mg/kg/day | Mid-dose<br>12<br>mg/kg/day | High-dose<br>24<br>mg/kg/day | Vehicle<br>Control<br>0<br>mg/kg/day | Low-dose<br>6<br>mg/kg/day | Mid-dose<br>12<br>mg/kg/day | High-dose<br>24<br>mg/kg/day |
| Number of<br>cages                           | 5                                 | 5                          | 5                           | 5                            | 5                                    | 5                          | 5                           | 5                            |
| <b>Day</b>                                   | 24.88 $\pm$                       | 24.62 $\pm$ 1.03           | 23.01 $\pm$                 | 23.27 $\pm$                  | 15.71 $\pm$                          | 16.51 $\pm$                | 15.78 $\pm$                 | 15.90 $\pm$                  |
| <b>1-8</b>                                   | 1.64                              |                            | 0.82                        | 0.90                         | 0.66                                 | 0.88                       | 0.84                        | 0.76                         |
| <b>Day 8-15</b>                              | 27.98 $\pm$                       | 27.86 $\pm$ 1.49           | 25.76 $\pm$                 | 26.33 $\pm$                  | 16.22 $\pm$ 0.68                     | 16.72 $\pm$                | 16.39 $\pm$                 | 16.24 $\pm$                  |
|                                              | 1.50                              |                            | 1.34                        | 1.05                         |                                      | 0.85                       | 0.92                        | 0.64                         |
| <b>Day 15-22</b>                             | 29.82 $\pm$                       | 29.77 $\pm$ 1.82           | 27.21 $\pm$                 | 27.35 $\pm$                  | 16.31 $\pm$                          | 17.38 $\pm$                | 16.65 $\pm$                 | 16.32 $\pm$                  |
|                                              | 1.84                              |                            | 1.98                        | 1.55                         | 0.60                                 | 1.53                       | 0.83                        | 0.55                         |
| <b>Day 22-29</b>                             | 29.36 $\pm$                       | 29.56 $\pm$ 2.42           | 26.56 $\pm$                 | 27.20 $\pm$                  | 16.79 $\pm$ 0.62                     | 17.98 $\pm$                | 17.00 $\pm$                 | 16.68 $\pm$                  |
|                                              | 1.17                              |                            | 2.13                        | 1.91                         |                                      | 0.95                       | 0.79                        | 0.84                         |
| <b>Day 29-36</b>                             | 28.97 $\pm$                       | 28.83 $\pm$ 2.39           | 25.74 $\pm$                 | 26.75 $\pm$                  | 17.20 $\pm$ 0.43                     | 17.61 $\pm$                | 17.01 $\pm$                 | 16.51 $\pm$                  |
|                                              | 1.49                              |                            | 1.65                        | 2.00                         |                                      | 1.24                       | 0.72                        | 0.71                         |
| <b>Day 36-43</b>                             | 29.26 $\pm$                       | 29.13 $\pm$ 2.37           | 26.11 $\pm$                 | 26.89 $\pm$                  | 16.65 $\pm$ 0.53                     | 17.42 $\pm$                | 16.73 $\pm$                 | 16.97 $\pm$                  |
|                                              | 2.11                              |                            | 1.67                        | 1.74                         |                                      | 1.23                       | 0.63                        | 1.11                         |
| <b>Day 43-50</b>                             | 29.56 $\pm$ 2.59                  | 29.34 $\pm$ 2.49           | 25.50 $\pm$                 | 25.79 $\pm$                  | 16.96 $\pm$                          | 17.55 $\pm$                | 16.90 $\pm$                 | 16.20 $\pm$                  |
|                                              |                                   |                            | 2.14                        | 2.02                         | 1.02                                 | 1.66                       | 0.85                        | 0.70                         |
| <b>Day 50-57</b>                             | 28.69 $\pm$                       | 28.64 $\pm$ 1.75           | 25.36 $\pm$                 | 26.29 $\pm$                  | 16.62 $\pm$ 0.69                     | 16.80 $\pm$                | 16.15 $\pm$                 | 15.89 $\pm$                  |
|                                              | 1.64                              |                            | 1.95*                       | 1.91                         |                                      | 0.90                       | 0.58                        | 1.01                         |
| <b>Day 57-64</b>                             | 27.23 $\pm$                       | 26.99 $\pm$ 2.04           | 24.33 $\pm$                 | 25.22 $\pm$                  | 16.15 $\pm$                          | 16.50 $\pm$                | 15.78 $\pm$                 | 15.37 $\pm$                  |
|                                              | 2.13                              |                            | 1.57                        | 1.82                         | 0.61                                 | 0.78                       | 0.77                        | 1.21                         |
| <b>Day 64-71</b>                             | 26.63 $\pm$                       | 26.81 $\pm$ 3.04           | 23.38 $\pm$                 | 24.80 $\pm$                  | 15.80 $\pm$ 0.95                     | 16.39 $\pm$                | 15.83 $\pm$                 | 15.00 $\pm$                  |
|                                              | 2.41                              |                            | 1.96                        | 1.77                         |                                      | 0.92                       | 0.85                        | 1.62                         |
| <b>Day 71-78</b>                             | 26.43 $\pm$ 2.40                  | 26.55 $\pm$ 2.09           | 23.96 $\pm$                 | 25.39 $\pm$                  | 15.85 $\pm$ 1.09                     | 15.71 $\pm$                | 15.41 $\pm$                 | 15.07 $\pm$                  |
|                                              |                                   |                            | 2.10                        | 1.79                         |                                      | 1.46                       | 1.06                        | 1.27                         |
| <b>Day 78-85</b>                             | 26.09 $\pm$ 2.83                  | 25.49 $\pm$ 1.96           | 22.68 $\pm$                 | 24.34 $\pm$                  | 15.98 $\pm$ 0.68                     | 15.92 $\pm$                | 15.78 $\pm$                 | 14.95 $\pm$                  |
|                                              |                                   |                            | 1.63                        | 2.12                         |                                      | 1.15                       | 0.83                        | 1.00                         |
| <b>Day 85-91</b>                             | 27.63 $\pm$                       | 27.41 $\pm$ 2.68           | 24.06 $\pm$                 | 25.80 $\pm$                  | 15.92 $\pm$ 0.55                     | 16.10 $\pm$                | 15.51 $\pm$                 | 15.68 $\pm$                  |
|                                              | 3.09                              |                            | 1.70                        | 1.89                         |                                      | 1.10                       | 0.82                        | 1.46                         |

\*:  $p \leq 0.05$  (compared to vehicle control group)

**Table S5.**

Ophthalmologic examinations of rats receiving astaxanthin over 13-week period

| Gender | Dose (mg/kg/day) | Ophthalmologic Examination (N/N) <sup>1</sup> |                          |
|--------|------------------|-----------------------------------------------|--------------------------|
|        |                  | Before study                                  | Before necropsy (Day 91) |
| Male   | 0                | 0/10                                          | 0/10                     |
|        | 6                | 0/10                                          | 0/10                     |
|        | 12               | 0/10                                          | 0/10                     |
|        | 24               | 0/10                                          | 0/10                     |
| Female | 0                | 0/10                                          | 0/10                     |
|        | 6                | 0/10                                          | 0/10                     |
|        | 12               | 0/10                                          | 0/10                     |
|        | 24               | 0/10                                          | 0/10                     |

<sup>1</sup> N/N: Number of animals with ophthalmologic abnormality/Total number of animals**Table S6.**

A. Absolute organ weight of rats receiving astaxanthin over 13-week period

| Parameters        |                   | Organs Weights (gram, Mean ± SD) |                   |                   |                   |                   |                   |                   |
|-------------------|-------------------|----------------------------------|-------------------|-------------------|-------------------|-------------------|-------------------|-------------------|
| Group             | Vehicle           | Low-dose                         | Mid-dose          | High-dose         | Vehicle           | Low-dose          | Mid-dose          | High-dose         |
|                   | Control           | 6                                | 12                | 24                | Control           | 6                 | 12                | 24                |
|                   | 0                 | mg/kg/day                        | mg/kg/day         | mg/kg/day         | 0                 | mg/kg/day         | mg/kg/day         | mg/kg/day         |
|                   | mg/kg/day         | mg/kg/day                        |                   |                   |                   |                   |                   |                   |
| Gender            | Male              |                                  |                   |                   | Female            |                   |                   |                   |
| Number of animals | 10                | 10                               | 10                | 10                | 10                | 10                | 10                | 10                |
| Adrenals          | 0.04955 ± 0.00546 | 0.05224 ± 0.00982                | 0.05446 ± 0.00564 | 0.05437 ± 0.00810 | 0.06268 ± 0.00862 | 0.05650 ± 0.00702 | 0.06074 ± 0.00816 | 0.06012 ± 0.00631 |
|                   | 0.01462 ± 0.00304 | 0.01265 ± 0.00325                | 0.01368 ± 0.00192 | 0.01479 ± 0.00070 | 0.01555 ± 0.00223 | 0.01525 ± 0.00240 | 0.01534 ± 0.00231 | 0.01581 ± 0.00182 |
| Brain             | 2.239 ± 0.107     | 2.132 ± 0.139                    | 2.235 ± 0.059     | 2.209 ± 0.147     | 2.014 ± 0.071     | 1.971 ± 0.052     | 1.985 ± 0.107     | 2.025 ± 0.062     |
|                   | 1.609 ± 0.181     | 1.632 ± 0.203                    | 1.550 ± 0.170     | 1.523 ± 0.154     | 0.912 ± 0.084     | 0.884 ± 0.062     | 0.872 ± 0.090     | 0.895 ± 0.082     |
| Heart             | 0.311 ± 0.060     | 0.289 ± 0.119                    | 0.350 ± 0.063     | 0.316 ± 0.084     | 0.211 ± 0.066     | 0.241 ± 0.043     | 0.232 ± 0.067     | 0.228 ± 0.050     |
|                   |                   |                                  |                   |                   |                   |                   |                   |                   |

|                      |                   |                   |                   |                   |                      |                      |                      |                      |
|----------------------|-------------------|-------------------|-------------------|-------------------|----------------------|----------------------|----------------------|----------------------|
| Liver                | 16.431 ±<br>2.811 | 14.985 ±<br>3.182 | 13.959 ±<br>2.310 | 13.951 ±<br>2.038 | 6.813 ±<br>0.477     | 7.428 ±<br>1.029     | 7.441 ±<br>1.160     | 7.147 ±<br>0.484     |
| Spleen               | 0.860 ±<br>0.124  | 0.775 ±<br>0.201  | 0.729 ±<br>0.113  | 0.745 ±<br>0.137  | 0.470 ±<br>0.088     | 0.474 ±<br>0.040     | 0.477 ±<br>0.087     | 0.494 ±<br>0.094     |
| Kidneys              | 3.555 ±<br>0.336  | 3.422 ±<br>0.494  | 3.316 ±<br>0.453  | 3.419 ±<br>0.370  | 1.745 ±<br>0.171     | 1.815 ±<br>0.154     | 1.831 ±<br>0.158     | 1.904 ±<br>0.109     |
| Testes               | 3.596 ±<br>0.307  | 3.448 ±<br>0.309  | 3.493 ±<br>0.205  | 3.532 ±<br>0.194  | NA                   | NA                   | NA                   | NA                   |
| Epididymides         | 1.321 ±<br>0.139  | 1.288 ±<br>0.077  | 1.272 ±<br>0.063  | 1.288 ±<br>0.078  | NA                   | NA                   | NA                   | NA                   |
| Prostate and Seminal | 3.471 ±<br>0.364  | 3.476 ±<br>0.379  | 3.443 ±<br>0.365  | 3.595 ±<br>0.144  | NA                   | NA                   | NA                   | NA                   |
| Ovary/Oviduct        | NA                | NA                | NA                | NA                | 0.11430 ±<br>0.01402 | 0.12051 ±<br>0.01612 | 0.11556 ±<br>0.02036 | 0.11830 ±<br>0.01136 |
| Uterus/Cervix        | NA                | NA                | NA                | NA                | 0.809 ±<br>0.359     | 0.737 ±<br>0.313     | 0.583 ±<br>0.181     | 0.720 ±<br>0.252     |

B. Estrus Cycle of female rats receiving astaxanthin over 13-week period

| Entrus Cycle Stages (Number of rats) |           |        |           |          |
|--------------------------------------|-----------|--------|-----------|----------|
| Group                                | Proestrus | Estrus | Metestrus | Diestrus |
| 1                                    | 7         | 0      | 3         | 0        |
| 2                                    | 6         | 1      | 3         | 0        |
| 3                                    | 7         | 1      | 2         | 0        |
| 4                                    | 7         | 1      | 2         | 0        |

C. Relative organ weights (organ-to-terminal body weight) of rats receiving astaxanthin over 13-week period

| Parameters        |                      | Organs Weights/Terminal Body Weight Ratio (% , Mean ± SD) |                       |                       |                      |                      |                      |                      |
|-------------------|----------------------|-----------------------------------------------------------|-----------------------|-----------------------|----------------------|----------------------|----------------------|----------------------|
| Group             | Vehicle              | Low-dose                                                  | Mid-dose              | High-dose             | Vehicle              | Low-dose             | Mid-dose             | High-dose            |
|                   | Control              | 6                                                         | 12                    | 24                    | Control              | 6                    | 12                   | 24                   |
|                   | 0                    | mg/kg/day                                                 | mg/kg/day             | mg/kg/day             | 0                    | mg/kg/day            | mg/kg/day            | mg/kg/day            |
|                   | mg/kg/day            |                                                           |                       |                       | mg/kg/day            |                      |                      |                      |
| Gender            | Male                 |                                                           |                       |                       | Female               |                      |                      |                      |
| Number of animals | 10                   | 10                                                        | 10                    | 10                    | 10                   | 10                   | 10                   | 10                   |
| Adrenals          | 0.00888 ±<br>0.00097 | 0.00956 ±<br>0.00127                                      | 0.01061 ±<br>0.00091* | 0.01051 ±<br>0.00163* | 0.02486 ±<br>0.00339 | 0.02273 ±<br>0.00284 | 0.02474 ±<br>0.00310 | 0.02422 ±<br>0.00260 |
| Pituitary         | 0.00262 ±            | 0.00230 ±                                                 | 0.00266 ±             | 0.00286 ±             | 0.00615 ±            | 0.00614 ±            | 0.00624 ±            | 0.00637 ±            |

|              |           |           |           |           |           |           |           |           |
|--------------|-----------|-----------|-----------|-----------|-----------|-----------|-----------|-----------|
|              | 0.00052   | 0.00042   | 0.00033   | 0.00023   | 0.00067   | 0.00097   | 0.00093   | 0.00075   |
| Brain        | 0.40285 ± | 0.39495 ± | 0.43780 ± | 0.42716 ± | 0.80089 ± | 0.79440 ± | 0.80995 ± | 0.81632 ± |
|              | 0.03701   | 0.04166   | 0.04396   | 0.03516   | 0.06253   | 0.06009   | 0.06083   | 0.04561   |
| Heart        | 0.28755 ± | 0.29980 ± | 0.30143 ± | 0.29365 ± | 0.36170 ± | 0.35526 ± | 0.35401 ± | 0.36036 ± |
|              | 0.01735   | 0.02230   | 0.02158   | 0.02386   | 0.03100   | 0.02071   | 0.01535   | 0.03169   |
| Thymus       | 0.05601 ± | 0.05146 ± | 0.06797 ± | 0.06036 ± | 0.08378 ± | 0.09693 ± | 0.09395 ± | 0.09235 ± |
|              | 0.01193   | 0.01675   | 0.00981   | 0.01375   | 0.02619   | 0.01699   | 0.02509   | 0.02307   |
| Liver        | 2.92675 ± | 2.71852 ± | 2.69910 ± | 2.67791 ± | 2.69980 ± | 2.98688 ± | 3.01070 ± | 2.87849 ± |
|              | 0.29745   | 0.26417   | 0.22519   | 0.22399   | 0.12228   | 0.40311*  | 0.23581*  | 0.19718   |
| Spleen       | 0.15367 ± | 0.13999 ± | 0.14189 ± | 0.14293 ± | 0.18606 ± | 0.19093 ± | 0.19329 ± | 0.19916 ± |
|              | 0.01694   | 0.02206   | 0.01932   | 0.01876   | 0.03330   | 0.02002   | 0.02788   | 0.03911   |
| Kidneys      | 0.63697 ± | 0.62867 ± | 0.64339 ± | 0.65838 ± | 0.69069 ± | 0.73006 ± | 0.74450 ± | 0.76700 ± |
|              | 0.04837   | 0.06658   | 0.04905   | 0.04684   | 0.04533   | 0.06278   | 0.03801   | 0.04710*  |
| Testes       | 0.64700 ± | 0.63801 ± | 0.68479 ± | 0.68349 ± | NA        | NA        | NA        | NA        |
|              | 0.07450   | 0.06988   | 0.08337   | 0.05478   |           |           |           |           |
| Epididymides | 0.23708 ± | 0.23939 ± | 0.24985 ± | 0.24891 ± | NA        | NA        | NA        | NA        |
|              | 0.02562   | 0.03312   | 0.03269   | 0.01691   |           |           |           |           |
| Prostate and | 0.623 ±   | 0.649 ±   | 0.675 ±   | 0.697 ±   | NA        | NA        | NA        | NA        |
| Seminal      | 0.065     | 0.127     | 0.101     | 0.067     |           |           |           |           |
| Ovary/       | NA        | NA        | NA        | NA        | 0.04548 ± | 0.04855 ± | 0.04696 ± | 0.04765 ± |
| Oviduct      |           |           |           |           | 0.00670   | 0.00713   | 0.00741   | 0.00455   |
| Uterus/      | NA        | NA        | NA        | NA        | 0.31725 ± | 0.29473 ± | 0.23741 ± | 0.29063 ± |
| Cervix       |           |           |           |           | 0.13315   | 0.12087   | 0.07090   | 0.10468   |

\*:  $p \leq 0.05$  (compared to vehicle control group)

Relative organ weight (%) = Absolute organ weight (g) / Terminal Body weight of rat on the day of sacrifice (g) x 100

#### D. Relative organ weight (organ-to-brain weight) of rats receiving astaxanthin over 13-week period

| Parameters        | Organs Weights/Terminal Body Weight Ratio (% , Mean ± SD) |           |             |           |           |           |             |             |
|-------------------|-----------------------------------------------------------|-----------|-------------|-----------|-----------|-----------|-------------|-------------|
|                   | Vehicle                                                   | Low-dose  | Mid-dose    | High-dose | Vehicle   | Low-dose  | Mid-dose    | High-dose   |
| Group             | Control                                                   | 6         | 12          | 24        | Control   | 6         | 12          | 24          |
|                   | 0                                                         | mg/kg/day | mg/kg/day   | mg/kg/day | 0         | mg/kg/day | mg/kg/day   | mg/kg/day   |
|                   | mg/kg/day                                                 |           |             |           | mg/kg/day |           |             |             |
| Gender            | Male                                                      |           |             |           | Female    |           |             |             |
| Number of animals | 10                                                        | 10        | 10          | 10        | 10        | 10        | 10          | 10          |
| Adrenals          | 2.21728 ±                                                 | 2.45088 ± | 2.43692 ±   | 2.47264 ± | 3.10798 ± | 2.86499 ± | 3.06796 ±   | 2.97251 ±   |
|                   | 0.26872                                                   | 0.43833   | 0.24853     | 0.41776   | 0.37457   | 0.33150   | 0.45910     | 0.34334     |
| Pituitary         | 0.65713 ±                                                 | 0.58897 ± | 0.61248 ±   | 0.67142 ± | 0.77200 ± | 0.77528 ± | 0.77358 ±   | 0.77962 ±   |
|                   | 0.14793                                                   | 0.13357   | 0.08798     | 0.04202   | 0.10760   | 0.13294   | 0.12024     | 0.07288     |
| Brain             | 100.00000                                                 | 100.00000 | 100.00000 ± | 100.00000 | 100.00000 | 100.00000 | 100.00000 ± | 100.00000 ± |



|                      |                       |                       |                       |                      |                      |                      |                      |                      |
|----------------------|-----------------------|-----------------------|-----------------------|----------------------|----------------------|----------------------|----------------------|----------------------|
|                      | ± 0.00000             | ± 0.00000             | 0.00000               | ± 0.00000            | ± 0.00000            | ± 0.00000            | 0.00000              | 0.00000              |
| Heart                | 71.93438 ± 8.09064    | 76.40161 ± 6.97738    | 69.36157 ± 7.47811    | 69.08830 ± 7.28754   | 45.27415 ± 3.78880   | 44.86268 ± 3.11345   | 43.95798 ± 4.18680   | 44.29964 ± 5.04055   |
| Thymus               | 13.87213 ± 2.42212    | 13.37398 ± 5.08095    | 15.64278 ± 2.63502    | 14.28617 ± 3.73081   | 10.45749 ± 3.13108   | 12.26994 ± 2.39970   | 11.64525 ± 3.07804   | 11.24520 ± 2.32978   |
| Liver                | 735.53341 ± 131.64079 | 699.78210 ± 131.27845 | 624.21273 ± 100.06107 | 631.59290 ± 81.93341 | 338.55639 ± 25.14445 | 376.61486 ± 49.06503 | 375.04653 ± 54.88274 | 353.33701 ± 27.64662 |
| Spleen               | 38.48325 ± 5.75422    | 36.16696 ± 8.63830    | 32.65621 ± 5.21805    | 33.63503 ± 5.08597   | 23.37912 ± 4.69625   | 24.04074 ± 1.86449   | 23.97242 ± 3.87714   | 24.36295 ± 4.32669   |
| Kidneys              | 158.97385 ± 15.29231  | 160.10357 ± 18.04395  | 148.45323 ± 20.43978  | 154.85288 ± 14.31550 | 86.59682 ± 7.46051   | 92.08376 ± 7.38824   | 92.21555 ± 5.77266   | 94.09488 ± 6.04684   |
| Testes               | 160.81788 ± 14.61765  | 161.80640 ± 11.57058  | 156.34507 ± 9.38066   | 160.31247 ± 10.77010 | NA                   | NA                   | NA                   | NA                   |
| Epididymides         | 58.98945 ± 5.50995    | 60.65638 ± 5.57287    | 56.95050 ± 3.19883    | 58.38157 ± 2.73921   | NA                   | NA                   | NA                   | NA                   |
| Prostate and Seminal | 155.361 ± 17.932      | 163.815 ± 22.269      | 154.329 ± 18.606      | 163.525 ± 14.414     | NA                   | NA                   | NA                   | NA                   |
| Ovary/ Oviduct       | NA                    | NA                    | NA                    | NA                   | 5.67960 ± 0.72943    | 6.11232 ± 0.78629    | 5.81201 ± 0.86809    | 5.84633 ± 0.58486    |
| Uterus/ Cervix       | NA                    | NA                    | NA                    | NA                   | 40.25734 ± 17.90657  | 37.68779 ± 16.87806  | 29.41385 ± 9.18077   | 35.58113 ± 12.44363  |

Relative organ weight (%) = Absolute organ weight (g) / Terminal Body weight of rat on the day of sacrifice (g) x 100

**Table S7.**

Gross necropsy of rats receiving astaxanthin over 13-week period

**Male**

| Group                                               | Control                | Low-dose | Mid-dose | High-dose |
|-----------------------------------------------------|------------------------|----------|----------|-----------|
| <b>Gross findings</b>                               | Incidence <sup>1</sup> |          |          |           |
| <b>Thymus</b>                                       |                        |          |          |           |
| Discoloration, present, red                         | <b>1/10</b>            | 0/10     | 0/10     | 0/10      |
| <b>Adrenal glands</b>                               |                        |          |          |           |
| Discoloration, present, multifocal, white           | <b>1/10</b>            | 0/10     | 0/10     | 0/10      |
| <b>Brain</b>                                        |                        |          |          |           |
| Abnormal shape, present, cerebrum, right, depressed | <b>1/10</b>            | 0/10     | 0/10     | 0/10      |

<sup>1</sup> Incidence = number of animals with gross findings / number of animals for gross examinations (N/N).

**Female**

| Group                               | Control                | Low-dose | Mid-dose | High-dose |
|-------------------------------------|------------------------|----------|----------|-----------|
| <b>Gross findings</b>               | Incidence <sup>1</sup> |          |          |           |
| <b>Mandibular lymph node</b>        |                        |          |          |           |
| Discoloration, present, red         | <b>1/10</b>            | 0/10     | 0/10     | 0/10      |
| <b>Liver</b>                        |                        |          |          |           |
| Nodule, present, right lateral lobe | <b>1/10</b>            | 0/10     | 0/10     | 0/10      |

<sup>1</sup> Incidence = number of animals with gross findings / number of animals for gross examinations (N/N).

**Table S8.**

Histopathology values of rats receiving astaxanthin over 13-week period

| Group                                        |                | Control                | Low-dose | Mid-dose | High-dose |                | Control                | Low-dose | Mid-dose | High-dose |
|----------------------------------------------|----------------|------------------------|----------|----------|-----------|----------------|------------------------|----------|----------|-----------|
| Histopathologic findings                     | S <sup>2</sup> | Incidence <sup>1</sup> |          |          |           | S <sup>2</sup> | Incidence <sup>1</sup> |          |          |           |
| Thymus                                       |                |                        |          |          |           |                |                        |          |          |           |
| Congestion                                   | P              | 1/10                   | NA       | NA       | 0/10      | P              | 1/10                   | NA       | NA       | 0/10      |
| Liver                                        |                |                        |          |          |           |                |                        |          |          |           |
| Infiltration, mononuclear cell               | 1              | 3/10                   | NA       | NA       | 4/10      | 1              | 4/10                   | NA       | NA       | 3/10      |
| Fatty change, minimal                        | 1              | 1/10                   | NA       | NA       | 0/10      | P              | 1/10                   | NA       | NA       | 0/10      |
| Kidneys                                      |                |                        |          |          |           |                |                        |          |          |           |
| Degeneration, tubular epithelial cell        | 1              | 1/10                   | NA       | NA       | 1/10      | 1              | 0/10                   | NA       | NA       | 1/10      |
| Infiltration, mononuclear cell, interstitial | 1              | 2/10                   | NA       | NA       | 2/10      | 1              | 1/10                   | NA       | NA       | 0/10      |
| Mineralization, corticomedullary junction    | 1              | 0/10                   | NA       | NA       | 1/10      |                |                        |          |          |           |

<sup>1</sup> Incidence = number of animals with histopathologic findings / Total number of animals for histopathologic examinations (N/N).

<sup>2</sup> The severity grading scheme: 1 = minimal (< 10%), 2 = mild (10–39%), 3 = moderate (40–79%), 4 = marked (80–100%), P = present.
